# Supplementary material
Source: Springer Nature journal article supplement (https://www.springermedizin.de/resource/supplementary/12891_2013_2323_MOESM1_ESM.pdf/9509946)
Supplement: MOESM1 [file 9509946]

MEDline = 405  
CINAHL= 234  
WOK = 38  
PEDro = 16  
SCOPUS= 341  
IME (CSIC) = 7  
Dialnet = 7

Electronic search of  
scientific databases.:  
MEDline (Pubmed),  
CINAHL, SCOPUS, PEDro,  
WOK, IME (CSIC), Dialnet.

1043 articles  
reviewed by title and  
abstract.

677 repeated articles  
(n = 366)

285 excluded articles  
due to the revision of  
the title  
(n= 81)

57 excluded articles  
due to the revision of  
the abstract (n=24)

19 excluded articles  
due to the revision of  
the full text.  
(n=5)

TOTAL:  
5 studies included.

5 excluded because of being in  
a different language to Spanish  
or English.

28 excluded for not dealing  
with the issue of the study.

10 excluded due to being  
surgical procedures.

12 excluded for being other  
pathologies.

2 excluded due to being acute  
tendinopathies.
